# Supplementary material for: Single-dose mRNA vaccine effectiveness against SARS-CoV-2, including P.1 and B.1.1.7 variants: a test-negative design in adults 70 years and older in British Columbia, Canada
Source: bioRxiv or medRxiv preprint supplement (doi:10.1101/2021.06.07.21258332), 2021-06-09
Supplement: Supplementary file [file media-1.pdf]

## Supplementary Material

Single-dose mRNA vaccine effectiveness against SARS-CoV-2, including P.1 and B.1.1.7 variants: a test-negative design in adults 70 years and older in British Columbia, Canada

|                                                                                                   |    |
|---------------------------------------------------------------------------------------------------|----|
| <b>Supplementary Material S1</b> Genetic characterization of SARS-CoV-2 viruses .....             | 2  |
| Supplementary Table S1 .....                                                                      | 3  |
| Supplementary Figure S1.....                                                                      | 4  |
| <b>Supplementary Figure S2</b> Summary of contributing specimens.....                             | 5  |
| <b>Supplementary Table S2</b> Single-dose VE by approach for test-negative control selection..... | 6  |
| <b>Supplementary Table S3</b> Single-dose VE by age subgroup.....                                 | 7  |
| <b>Supplementary Table S4</b> Single-dose VE by sex.....                                          | 8  |
| <b>Supplementary Table S5</b> Single-dose VE by epidemiological week (bi-weekly) .....            | 9  |
| <b>Supplementary Table S6</b> Single-dose VE by mRNA vaccine type .....                           | 10 |
| <b>Supplementary Table S7</b> Single-dose VE by VOC status: non-VOC, B.1.1.7 and P.1 .....        | 11 |
| <b>Supplementary Table S8</b> Single-dose VE: P.1 sensitivity analysis .....                      | 12 |

## Supplementary Material S1 Genetic characterization of SARS-CoV-2 viruses

To understand the mix of SARS-CoV-2 viruses underpinning vaccine effectiveness (VE) findings and to support variant-specific VE estimates, we attempted to genetically characterize all viruses collected from the 1,226 cases  $\geq 70$  years old who contributed to VE analyses.

Viruses were genetically grouped based upon: (a) whole genome sequencing (WGS) and/or (b) real-time reverse transcription polymerase chain reaction (RT-PCR) screening assays targeting signature mutations of particular variants of concern (VOC)<sup>1,2</sup> Where WGS and screening RT-PCR assays were discordant, WGS results were accepted. Where uncertainty remained, specimens were excluded.

### Whole genome sequencing

WGS was performed at the British Columbia Centre for Disease Control Public Health Laboratory (BCCDC PHL). In brief, SARS-CoV-2 RNA was extracted using the Applied BioSystems MagMax™ Express 96 Nucleic Acid Extractor and the MagMax Viral/Pathogen Nucleic Acid Isolation Kit (Thermo Fisher). Viral RNA was reverse transcribed into cDNA using Thermo SuperScript IV. A 1200bp tiled amplicon scheme<sup>3</sup> was used to amplify the entire SARS-CoV-2 genome<sup>4</sup>. DNA libraries were prepared using DNA Prep Library Preparation Kit (Illumina) and sequenced on a MiSeq or NextSeq 2000 instrument (Illumina, San Diego). SARS-CoV-2 whole genome consensus sequences were generated using a modified Nextflow pipeline for running the ARTIC network's<sup>5</sup> field bioinformatics tools<sup>6</sup>. Lineages were assigned using Pangolin (version 2.4.2, pangoleARN 2021-05-19)<sup>7</sup> and sequencing quality control metrics and mutational profiles used nCoV-tools from the Simpson Lab<sup>8</sup>.

### Screening RT-PCR

Four VOC screening RT-PCR assays were used at the BCCDC PHL and various hospital-based laboratories across the province including (1) a laboratory-developed N501Y single nucleotide polymorphism (SNP) PCR at the Victoria General Hospital located within Vancouver Island Health Authority<sup>9</sup>; (2) a laboratory-developed N501Y and E484K dual SNP PCR at the BCCDC PHL; (3) a laboratory developed sequential deletion and SNP PCR including N501Y and K417T at the St. Paul's Hospital Laboratory located within Vancouver Coastal Health Authority<sup>10</sup>; and (4) the commercial Seegene Allplex™ SARS-CoV-2 Variant I Assay (Seegene, Seoul, South Korea) targeting N501Y and E484K at the Kelowna General Hospital Microbiology Laboratory in the Interior Health Authority.

Based on the above, viruses were categorized as follows:

---

<sup>1</sup> Government of Canada. SARS-CoV-2 variants: National definitions, classifications and public health actions. [Accessed 2 June 2021]. Available: <https://www.canada.ca/en/public-health/services/diseases/2019-novel-coronavirus-infection/health-professionals/testing-diagnosing-case-reporting/sars-cov-2-variants-national-definitions-classifications-public-health-actions.html>

<sup>2</sup> World Health Organization. Tracking SARS-CoV-2 variants. [Accessed 2 June 2021]. Available: <https://www.who.int/en/activities/tracking-SARS-CoV-2-variants/>

<sup>3</sup> Freed NE, Vlková M, Faisal MB, Silander OK. Rapid and inexpensive whole-genome sequencing of SARS-CoV-2 using 1200 bp tiled amplicons and Oxford Nanopore Rapid Barcoding. *Biol Methods Protoc.* 2020 Jul 18;5(1):bpaa014.

<sup>4</sup> Galloway SE, Paul P, MacCannell DR, et al. Emergence of SARS-CoV-2 B.1.1.7 Lineage - United States, December 29, 2020-January 12, 2021. *MMWR Morb Mortal Wkly Rep.* 2021 Jan 22;70(3):95-9.

<sup>5</sup> <https://artic.network/ncov-2019>

<sup>6</sup> <https://github.com/BCCDC-PHL/ncov2019-artic-nf>

<sup>7</sup> Rambaut A, Holmes EC, O'Toole A, et al. A dynamic nomenclature proposal for SARS-CoV-2 lineages to assist genomic epidemiology. *Nature Microbiology* 2020;5:1403-07. Available: <https://www.nature.com/articles/s41564-020-0770-5>

<sup>8</sup> <https://github.com/jts/ncov-tools>

<sup>9</sup> Horgan CA, Sbihi H, Jassem A, et al. Optimizing SARS-CoV-2 variant of concern screening: experience from British Columbia, Canada, Early 2021. *MedRxiv* 2021.03.23.21253520; (Pre-print) doi: <https://www.medrxiv.org/content/10.1101/2021.03.23.21253520v1>

<sup>10</sup> Matic N, Lowe CF, Ritchie G, et al. Rapid detection of SARS-CoV-2 variants of concern, including B.1.1.28/P.1, British Columbia, Canada. 2021;27(6):1673-1676. doi:10.3201/eid2706.210532. [https://wwwnc.cdc.gov/eid/article/27/6/21-0532\\_article](https://wwwnc.cdc.gov/eid/article/27/6/21-0532_article)

**Non-VOC**

WGS = non-VOC or

Screening RT-PCR = Negative for N501Y (presumptive)

**B.1.1.7**

WGS = B.1.1.7 or

Screening RT-PCR = Positive for N501Y and positive for 69/70 deletion or positive for N501Y and negative for E484K (presumptive)

**B.1.351\***

WGS = B.1.351 or

Screening RT-PCR = Positive for N501Y and negative for K417T (presumptive)

**P.1\***

WGS = P.1 or

Screening RT-PCR = Positive for N501Y and positive for K417T (presumptive)

**B.1.617.1/2**

WGS = B.1.617.1/2

Screening RT-PCR = Not established

\*Both B.1.351 and P.1 bear the E484K substitution and cannot be distinguished on that basis by RT-PCR screening.

The above algorithm resulted in VOC classification of **1,131/1,226 (92%)** case viruses<sup>1</sup> as shown in the [Table S1](#) below and showing comparable distribution by participant subgroup in [Figure S1](#) below:

**Table S1:** Tally of classified VOC and non-VOC case viruses, by genetic sub-grouping

|                  | Non-VOC    | B.1.1.7    | P.1 and B.1.351 |               |                                          |                      | B.1.617.1/2 <sup>1</sup> | Total        |
|------------------|------------|------------|-----------------|---------------|------------------------------------------|----------------------|--------------------------|--------------|
|                  |            |            | P.1             | 501Y + 417T + | 501Y + and 484K +, 417 SNP not available | B.1.351 <sup>1</sup> |                          |              |
| WGS              | 65         | 142        | 280             | -             | -                                        | 4                    | 16                       | 510          |
| Screening RT-PCR | 211        | 367        | -               | 34            | 12                                       | -                    | -                        | 626          |
| <b>Total</b>     | <b>276</b> | <b>509</b> | <b>326</b>      |               |                                          | <b>4</b>             | <b>16</b>                | <b>1,131</b> |

<sup>1</sup> Excluded from variant-specific VE analyses owing to small sample size

**Variant-specific VE for P.1 was assessed in three ways:**

- (1) Confirmed and presumptive P.1 *all* (n=326): defined by WGS (n=280) and screening assay positivity for 501Y and 417T (n=34), also including specimens that were 501Y+484K positive but for which the 417 SNP was unavailable (n=12), the latter presumptively assigned P.1 given a paucity of B.1.351 otherwise detected in BC;
- (2) Confirmed and presumptive P.1 *subset* (n=314), defined as above but excluding specimens for which the 417 SNP was not available [NOTE: this group forms the basis of our primary P.1-specific analysis];
- (3) Confirmed P.1 (n=280), defined by WGS only.

**VE estimates were similar for all three definitions of P.1** (see [Supplement Table S7](#) and [Supplement Table S8](#)). We therefore present definition 2 (n=314 cases) as the primary P.1-specific VE analysis.

<sup>1</sup> Of the 95 case viruses excluded from VOC classification, 6 were subjected to WGS and 89 were not. Of the 6 excluded viruses that were subjected to WGS, 5 were non-VOC that were 484K positive on screening RT-PCR (including 3 designated B.1.525), and one was a presumptive B.1.1.7 on screening RT-PCR not reinforced by WGS (B.1.1). Of the 89 viruses that were not subjected to WGS, screening RT-PCR showed that 2 were 501Y negative (presumptive non-VOC) but 484K positive; 4 were 501Y positive but results for the 417 and 484 SNP were not available; and 85 lacked information on the 501 SNP required for presumptive VOC classification.

**Figure S1:** Distribution of variants of concern (VOC) as identified among genetically characterized viruses contributing to vaccine effectiveness (VE) analyses, adults  $\geq 70$  years old, British Columbia (BC), Canada, epidemiological weeks 14-17

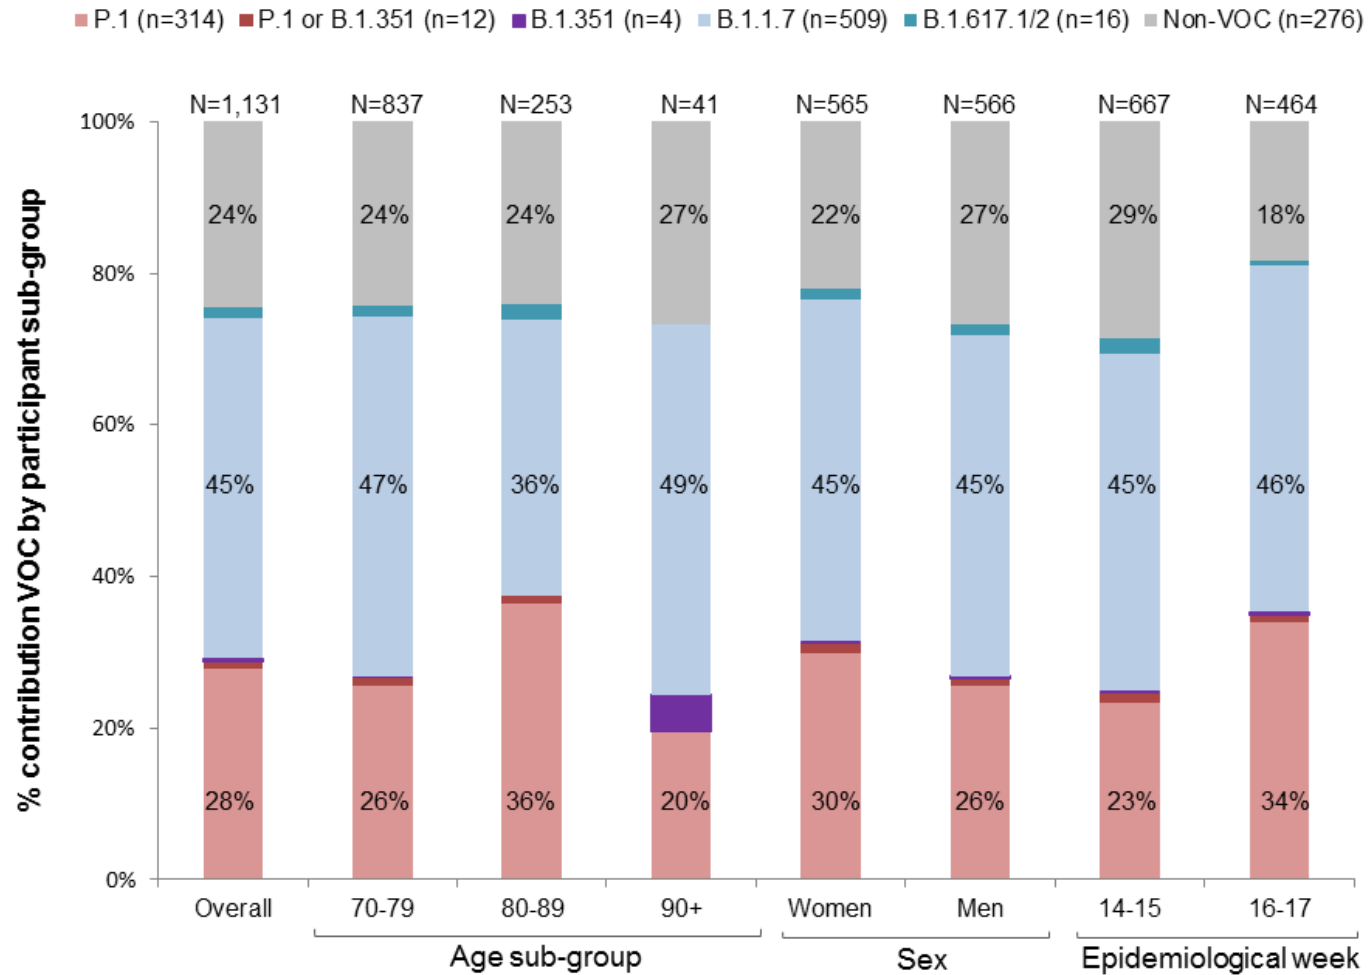

**Supplementary Figure S2.** Specimens from community-dwelling adults  $\geq 70$  years old included in vaccine effectiveness (VE) analyses, April 4 (week 14) to May 1 (week 17), 2021, British Columbia (BC), Canada

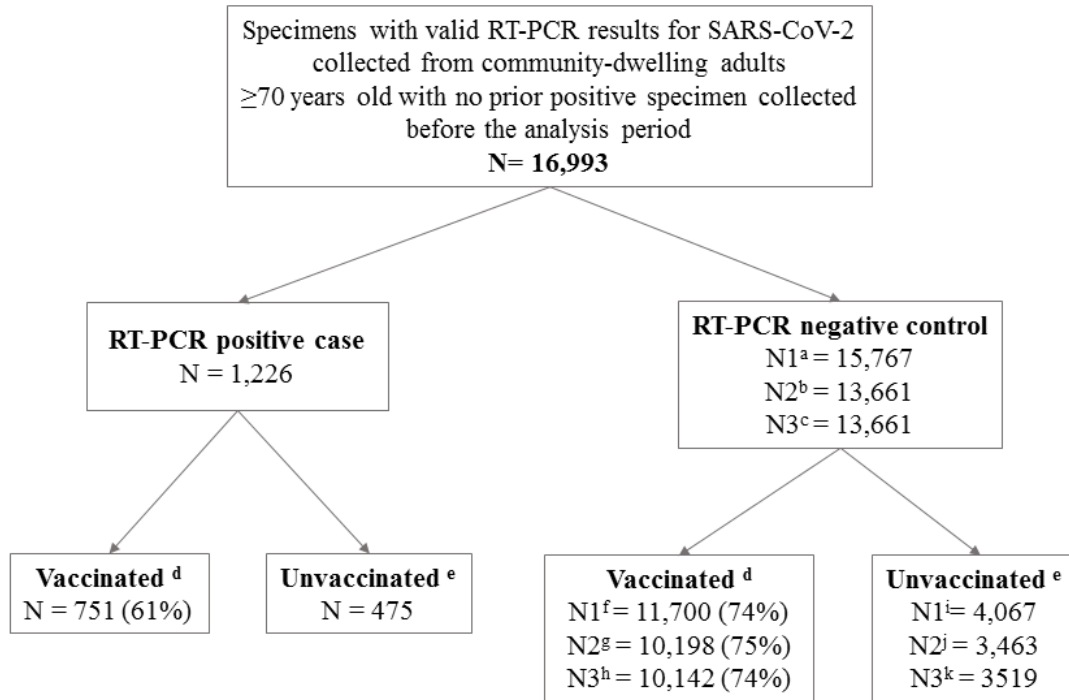

- a. Approach 1 for control selection: all negative specimens collected from individuals before the end of the analysis period or becoming a case, whichever occurs first
- b. Approach 2 for control selection: one negative specimen (the latest) collected per individual before the end of the analysis period or becoming a case, whichever occurs first
- c. Approach 3 for control selection: one randomly selected specimen collected per individual before the end of the analysis period or becoming a case, whichever occurs first
- d. Vaccinated on or before the date of specimen collection
- e. Not vaccinated on or before the date of specimen collection
- f. Vaccinated controls selected as per approach 1
- g. Vaccinated controls selected as per approach 2
- h. Vaccinated controls selected as per approach 3
- i. Unvaccinated controls selected as per approach 1
- j. Unvaccinated controls selected as per approach 2
- k. Unvaccinated controls selected as per approach 3

**Supplementary Table S2.** Single-dose mRNA vaccine effectiveness by approach for test-negative control selection, adults ≥70 years, BC, Canada

| Interval (DSV)                                                                                                  | Case status | By approach for selecting among repeat test-negative control specimens |          |                     |                                     |                                                  |          |                     |                                     |                                                  |          |                     |                                     |
|-----------------------------------------------------------------------------------------------------------------|-------------|------------------------------------------------------------------------|----------|---------------------|-------------------------------------|--------------------------------------------------|----------|---------------------|-------------------------------------|--------------------------------------------------|----------|---------------------|-------------------------------------|
|                                                                                                                 |             | Approach 1 (all test-negative controls)                                |          |                     |                                     | Approach 2 (single latest test-negative control) |          |                     |                                     | Approach 3 (single random test-negative control) |          |                     |                                     |
|                                                                                                                 |             | Vacc N (%)                                                             | Unvacc N | Crude VE % (95% CI) | Adjusted <sup>1</sup> VE % (95% CI) | Vacc N (%)                                       | Unvacc N | Crude VE % (95% CI) | Adjusted <sup>1</sup> VE % (95% CI) | Vacc N (%)                                       | Unvacc N | Crude VE % (95% CI) | Adjusted <sup>1</sup> VE % (95% CI) |
| <b>Without excluding test-negative specimens collected within three weeks prior to a test-positive specimen</b> |             |                                                                        |          |                     |                                     |                                                  |          |                     |                                     |                                                  |          |                     |                                     |
| 0-13                                                                                                            | Case        | 345 (42%)                                                              | 475      | 4                   | 14                                  | 345 (42%)                                        | 475      | 6                   | 16                                  | 345 (42%)                                        | 475      | 7                   | 16                                  |
|                                                                                                                 | Control     | 3078 (43%)                                                             | 4067     | (-11, 17)           | (0, 26)                             | 2666 (43%)                                       | 3463     | (-9, 19)            | (2, 28)                             | 2740 (44%)                                       | 3519     | (-8, 20)            | (3, 28)                             |
| 14-20                                                                                                           | Case        | 163 (26%)                                                              | 475      | 39                  | 43                                  | 163 (26%)                                        | 475      | 41                  | 44                                  | 163 (26%)                                        | 475      | 40                  | 45                                  |
|                                                                                                                 | Control     | 2301 (36%)                                                             | 4067     | (27, 50)            | (30, 53)                            | 2014 (37%)                                       | 3463     | (29, 51)            | (32, 54)                            | 2029 (37%)                                       | 3519     | (28, 51)            | (33, 54)                            |
| 21-27                                                                                                           | Case        | 110 (19%)                                                              | 475      | 57                  | 57                                  | 110 (19%)                                        | 475      | 58                  | 59                                  | 110 (19%)                                        | 475      | 57                  | 59                                  |
|                                                                                                                 | Control     | 2192 (35%)                                                             | 4067     | (47, 65)            | (47, 66)                            | 1912 (36%)                                       | 3463     | (48, 66)            | (48, 67)                            | 1909 (35%)                                       | 3519     | (47, 66)            | (49, 68)                            |
| 28-34                                                                                                           | Case        | 61 (11%)                                                               | 475      | 71                  | 69                                  | 61 (11%)                                         | 475      | 71                  | 70                                  | 61 (11%)                                         | 475      | 70                  | 70                                  |
|                                                                                                                 | Control     | 1790 (31%)                                                             | 4067     | (62, 78)            | (59, 77)                            | 1557 (31%)                                       | 3463     | (62, 78)            | (59, 77)                            | 1529 (30%)                                       | 3519     | (61, 78)            | (59, 77)                            |
| 35-41                                                                                                           | Case        | 30 (6%)                                                                | 475      | 78                  | 75                                  | 30 (6%)                                          | 475      | 78                  | 75                                  | 30 (6%)                                          | 475      | 77                  | 75                                  |
|                                                                                                                 | Control     | 1180 (22%)                                                             | 4067     | (68, 85)            | (63, 83)                            | 1016 (23%)                                       | 3463     | (69, 85)            | (63, 83)                            | 983 (22%)                                        | 3519     | (67, 84)            | (63, 83)                            |
| ≥42                                                                                                             | Case        | 42 (8%)                                                                | 475      | 69                  | 63                                  | 42 (8%)                                          | 475      | 70                  | 64                                  | 42 (8%)                                          | 475      | 67                  | 63                                  |
|                                                                                                                 | Control     | 1150 (22%)                                                             | 4067     | (57, 77)            | (48, 74)                            | 1024 (23%)                                       | 3463     | (59, 78)            | (48, 75)                            | 945 (21%)                                        | 3519     | (54, 76)            | (47, 74)                            |
| ≥21                                                                                                             | Case        | 243 (34%)                                                              | 475      | 67                  | 65                                  | 243 (34%)                                        | 475      | 68                  | 66                                  | 243 (34%)                                        | 475      | 66                  | 66                                  |
|                                                                                                                 | Control     | 6321 (61%)                                                             | 4067     | (61, 72)            | (58, 71)                            | 5518 (61%)                                       | 3463     | (62, 73)            | (59, 72)                            | 5373 (60%)                                       | 3519     | (61, 71)            | (59, 72)                            |
| <b>Excluding negative specimens collected within three weeks prior to a test-positive specimen</b>              |             |                                                                        |          |                     |                                     |                                                  |          |                     |                                     |                                                  |          |                     |                                     |
| 0-13                                                                                                            | Case        | 345 (42%)                                                              | 475      | 4                   | 13                                  | 345 (42%)                                        | 475      | 6                   | 16                                  | 345 (42%)                                        | 475      | 6                   | 16                                  |
|                                                                                                                 | Control     | 3050 (43%)                                                             | 4033     | (-11, 17)           | (-1, 26)                            | 2640 (43%)                                       | 3434     | (-10, 18)           | (2, 28)                             | 2694 (44%)                                       | 3499     | (-9, 19)            | (2, 28)                             |
| 14-20                                                                                                           | Case        | 163 (26%)                                                              | 475      | 40                  | 43                                  | 163 (26%)                                        | 475      | 41                  | 44                                  | 163 (26%)                                        | 475      | 41                  | 45                                  |
|                                                                                                                 | Control     | 2289 (36%)                                                             | 4033     | (27, 50)            | (31, 53)                            | 2002 (37%)                                       | 3434     | (29, 51)            | (32, 54)                            | 2018 (37%)                                       | 3499     | (28, 51)            | (33, 55)                            |
| 21-27                                                                                                           | Case        | 110 (19%)                                                              | 475      | 57                  | 58                                  | 110 (19%)                                        | 475      | 58                  | 59                                  | 110 (19%)                                        | 475      | 58                  | 59                                  |
|                                                                                                                 | Control     | 2186 (35%)                                                             | 4033     | (47, 66)            | (47, 66)                            | 1906 (36%)                                       | 3434     | (48, 66)            | (48, 67)                            | 1913 (35%)                                       | 3499     | (47, 66)            | (49, 68)                            |
| 28-34                                                                                                           | Case        | 61 (11%)                                                               | 475      | 71                  | 69                                  | 61 (11%)                                         | 475      | 72                  | 70                                  | 61 (11%)                                         | 475      | 70                  | 70                                  |
|                                                                                                                 | Control     | 1785 (31%)                                                             | 4033     | (62, 78)            | (59, 77)                            | 1552 (31%)                                       | 3434     | (63, 78)            | (60, 78)                            | 1520 (30%)                                       | 3499     | (61, 78)            | (60, 78)                            |
| 35-41                                                                                                           | Case        | 30 (6%)                                                                | 475      | 78                  | 75                                  | 30 (6%)                                          | 475      | 79                  | 76                                  | 30 (6%)                                          | 475      | 77                  | 75                                  |
|                                                                                                                 | Control     | 1177 (23%)                                                             | 4033     | (69, 85)            | (63, 83)                            | 1013 (23%)                                       | 3434     | (69, 85)            | (63, 84)                            | 972 (22%)                                        | 3499     | (67, 84)            | (63, 83)                            |
| ≥42                                                                                                             | Case        | 42 (8%)                                                                | 475      | 69                  | 63                                  | 42 (8%)                                          | 475      | 70                  | 64                                  | 42 (8%)                                          | 475      | 67                  | 63                                  |
|                                                                                                                 | Control     | 1141 (22%)                                                             | 4033     | (57, 77)            | (48, 74)                            | 1017 (23%)                                       | 3434     | (59, 78)            | (48, 75)                            | 950 (21%)                                        | 3499     | (55, 76)            | (47, 74)                            |
| ≥21                                                                                                             | Case        | 243 (34%)                                                              | 475      | 67                  | 66                                  | 243 (34%)                                        | 475      | 68                  | 66                                  | 243 (34%)                                        | 475      | 67                  | 66                                  |
|                                                                                                                 | Control     | 6298 (61%)                                                             | 4033     | (62, 72)            | (59, 71)                            | 5497 (62%)                                       | 3434     | (62, 73)            | (59, 72)                            | 5362 (61%)                                       | 3499     | (61, 72)            | (59, 72)                            |

DSV = Days since vaccination, the interval in days between the date of receipt of the first mRNA dose and the date of specimen collection  
 Vacc = vaccinated; Unvacc = Unvaccinated; VE = vaccine effectiveness; 95% CI = 95% confidence interval

<sup>1</sup> VE estimates adjusted for age group (70-79, 80-89, 90+ years); sex (men, women); epidemiological week (14, 15, 16, or 17); and health authority (HA) (Fraser HA, Interior HA, Northern HA, Vancouver Coastal HA, Vancouver Island HA).

**Supplementary Table S3.** Single-dose mRNA vaccine effectiveness by age subgroup, adults ≥70 years, British Columbia, Canada

| Interval (DSV) | Case status | By age subgroup |          |                     |                                     |             |          |                     |                                     |            |          |                     |                                     |
|----------------|-------------|-----------------|----------|---------------------|-------------------------------------|-------------|----------|---------------------|-------------------------------------|------------|----------|---------------------|-------------------------------------|
|                |             | 70-79 years     |          |                     |                                     | 80-89 years |          |                     |                                     | ≥80 years  |          |                     |                                     |
|                |             | Vacc N (%)      | Unvacc N | Crude VE % (95% CI) | Adjusted <sup>1</sup> VE % (95% CI) | Vacc N (%)  | Unvacc N | Crude VE % (95% CI) | Adjusted <sup>1</sup> VE % (95% CI) | Vacc N (%) | Unvacc N | Crude VE % (95% CI) | Adjusted <sup>2</sup> VE % (95% CI) |
| 0-13           | Case        | 296 (44%)       | 384      | 7                   | 16                                  | 45 (36%)    | 80       | 11                  | 6                                   | 49 (35%)   | 91       | 2                   | 5                                   |
|                | Control     | 2492 (45%)      | 3003     | (-9, 21)            | (1, 28)                             | 523 (39%)   | 825      | (-30, 39)           | (-41, 38)                           | 586 (36%)  | 1064     | (-40, 32)           | (-41, 35)                           |
| 14-20          | Case        | 116 (23%)       | 384      | 40                  | 46                                  | 43 (35%)    | 80       | 36                  | 39                                  | 47 (34%)   | 91       | 29                  | 36                                  |
|                | Control     | 1522 (34%)      | 3003     | (26, 52)            | (32, 57)                            | 692 (46%)   | 825      | (6, 56)             | (9, 59)                             | 779 (42%)  | 1064     | (-2, 51)            | (6, 56)                             |
| 21-27          | Case        | 64 (14%)        | 384      | 56                  | 61                                  | 39 (33%)    | 80       | 54                  | 54                                  | 46 (34%)   | 91       | 49                  | 50                                  |
|                | Control     | 1127 (27%)      | 3003     | (42, 66)            | (47, 71)                            | 880 (52%)   | 825      | (32, 69)            | (32, 70)                            | 1065 (50%) | 1064     | (27, 65)            | (27, 66)                            |
| 28-34          | Case        | 23 (6%)         | 384      | 75                  | 77                                  | 31 (28%)    | 80       | 62                  | 64                                  | 38 (29%)   | 91       | 58                  | 59                                  |
|                | Control     | 734 (20%)       | 3003     | (62, 84)            | (64, 85)                            | 838 (50%)   | 825      | (42, 75)            | (44, 77)                            | 1056 (50%) | 1064     | (38, 71)            | (39, 73)                            |
| 35-41          | Case        | 13 (3%)         | 384      | 70                  | 73                                  | 15 (16%)    | 80       | 75                  | 75                                  | 17 (16%)   | 91       | 77                  | 76                                  |
|                | Control     | 335 (10%)       | 3003     | (47, 83)            | (51, 85)                            | 626 (43%)   | 825      | (57, 86)            | (55, 86)                            | 845 (44%)  | 1064     | (60, 86)            | (59, 86)                            |
| ≥42            | Case        | 17 (4%)         | 384      | 60                  | 63                                  | 18 (18%)    | 80       | 65                  | 66                                  | 25 (22%)   | 91       | 64                  | 64                                  |
|                | Control     | 329 (10%)       | 3003     | (33, 75)            | (38, 78)                            | 526 (39%)   | 825      | (40, 79)            | (39, 81)                            | 821 (44%)  | 1064     | (44, 77)            | (39, 78)                            |
| ≥21            | Case        | 117 (23%)       | 384      | 64                  | 67                                  | 103 (56%)   | 80       | 63                  | 65                                  | 126 (58%)  | 91       | 61                  | 62                                  |
|                | Control     | 2530 (46%)      | 3003     | (55, 71)            | (59, 74)                            | 2873 (78%)  | 825      | (50, 73)            | (52, 75)                            | 3791 (78%) | 1064     | (49, 71)            | (49, 72)                            |

DSV = Days since vaccination, the interval in days between the date of receipt of the first mRNA dose and the date of specimen collection  
 Vacc = vaccinated; Unvacc = Unvaccinated; VE = vaccine effectiveness; 95% CI = 95% confidence interval

<sup>1</sup> VE estimates adjusted for sex (men, women); epidemiological week (14, 15, 16, or 17); and health authority (HA) (Fraser HA, Interior HA, Northern HA, Vancouver Coastal HA, Vancouver Island HA).

<sup>2</sup> VE estimates adjusted for age group (80-89, 90+ years); sex (men, women); epidemiological week (14, 15, 16, or 17); and health authority (HA) (Fraser HA, Interior HA, Northern HA, Vancouver Coastal HA, Vancouver Island HA).

**Supplementary Table S4.** Single-dose mRNA vaccine effectiveness by sex, adults ≥70 years, British Columbia, Canada

| Interval (DSV) | Case status | By sex           |                |                     |                                     |                  |                |                     |                                     |
|----------------|-------------|------------------|----------------|---------------------|-------------------------------------|------------------|----------------|---------------------|-------------------------------------|
|                |             | Women            |                |                     |                                     | Men              |                |                     |                                     |
|                |             | Vaccinated N (%) | Unvaccinated N | Crude VE % (95% CI) | Adjusted <sup>1</sup> VE % (95% CI) | Vaccinated N (%) | Unvaccinated N | Crude VE % (95% CI) | Adjusted <sup>1</sup> VE % (95% CI) |
| 0-13           | Case        | 163 (40%)        | 247            | 8                   | 16                                  | 182 (44%)        | 228            | 0                   | 10                                  |
|                | Control     | 1475 (42%)       | 2054           | (-13, 25)           | (-4, 32)                            | 1603 (44%)       | 2013           | (-23, 18)           | (-11, 28)                           |
| 14-20          | Case        | 83 (25%)         | 247            | 41                  | 44                                  | 80 (26%)         | 228            | 37                  | 40                                  |
|                | Control     | 1175 (36%)       | 2054           | (24, 55)            | (28, 57)                            | 1126 (36%)       | 2013           | (18, 52)            | (20, 54)                            |
| 21-27          | Case        | 48 (16)          | 247            | 65                  | 66                                  | 62 (21%)         | 228            | 48                  | 47                                  |
|                | Control     | 1129 (35%)       | 2054           | (51, 74)            | (52, 75)                            | 1063 (35%)       | 2013           | (31, 61)            | (28, 62)                            |
| 28-34          | Case        | 37 (13%)         | 247            | 68                  | 67                                  | 24 (10%)         | 228            | 74                  | 72                                  |
|                | Control     | 960 (32%)        | 2054           | (54, 77)            | (52, 78)                            | 830 (29%)        | 2013           | (61, 83)            | (55, 82)                            |
| 35-41          | Case        | 16 (6%)          | 247            | 79                  | 77                                  | 14 (6%)          | 228            | 78                  | 72                                  |
|                | Control     | 627 (23%)        | 2054           | (65, 87)            | (60, 87)                            | 553 (22%)        | 2013           | (61, 87)            | (50, 85)                            |
| ≥42            | Case        | 18 (7%)          | 247            | 76                  | 72                                  | 24 (10%)         | 228            | 60                  | 53                                  |
|                | Control     | 619 (23%)        | 2054           | (61, 85)            | (52, 83)                            | 531 (21%)        | 2013           | (39, 74)            | (23, 71)                            |
| ≥21            | Case        | 119 (33%)        | 247            | 70                  | 70                                  | 124 (35%)        | 228            | 63                  | 60                                  |
|                | Control     | 3341 (62%)       | 2054           | (63, 76)            | (61, 76)                            | 2980 (60%)       | 2013           | (54, 71)            | (48, 70)                            |

DSV = Days since vaccination, the interval in days between the date of receipt of the first mRNA dose and the date of specimen collection

VE = vaccine effectiveness; 95% CI = 95% confidence interval

<sup>1</sup> VE estimates adjusted for: age group (70-79, 80-89, 90+ years); epidemiological week (14, 15, 16, or 17); and health authority (HA) (Fraser HA, Interior HA, Northern HA, Vancouver Coastal HA, Vancouver Island HA).



**Supplementary Table S5.** Single-dose mRNA vaccine effectiveness by epidemiological week, adults  $\geq 70$  years, British Columbia, Canada

| Interval (DSV) | Case status | By epidemiological week (bi-weekly) |                |                     |                                     |                  |                |                     |                                     |
|----------------|-------------|-------------------------------------|----------------|---------------------|-------------------------------------|------------------|----------------|---------------------|-------------------------------------|
|                |             | Weeks 14-15                         |                |                     |                                     | Weeks 16-17      |                |                     |                                     |
|                |             | Vaccinated N (%)                    | Unvaccinated N | Crude VE % (95% CI) | Adjusted <sup>1</sup> VE % (95% CI) | Vaccinated N (%) | Unvaccinated N | Crude VE % (95% CI) | Adjusted <sup>2</sup> VE % (95% CI) |
| 0-13           | Case        | 228 (41%)                           | 327            | 9                   | 18                                  | 117 (44%)        | 148            | -8                  | 2                                   |
|                | Control     | 2101 (43%)                          | 2738           | (-9, 24)            | (2, 32)                             | 977 (42%)        | 1329           | (-39, 17)           | (-28, 26)                           |
| 14-20          | Case        | 85 (21%)                            | 327            | 41                  | 41                                  | 78 (35%)         | 148            | 35                  | 45                                  |
|                | Control     | 1216 (31%)                          | 2738           | (25, 54)            | (23, 55)                            | 1085 (45%)       | 1329           | (14, 51)            | (25, 59)                            |
| 21-27          | Case        | 42 (11%)                            | 327            | 63                  | 59                                  | 68 (31%)         | 148            | 51                  | 56                                  |
|                | Control     | 945 (26%)                           | 2738           | (48, 73)            | (42, 71)                            | 1247 (48%)       | 1329           | (34, 64)            | (41, 68)                            |
| 28-34          | Case        | 24 (7%)                             | 327            | 66                  | 60                                  | 37 (20%)         | 148            | 72                  | 75                                  |
|                | Control     | 583 (18%)                           | 2738           | (47, 77)            | (37, 75)                            | 1207 (48%)       | 1329           | (60, 81)            | (63, 83)                            |
| 35-41          | Case        | 6 (2%)                              | 327            | 84                  | 81                                  | 24 (14%)         | 148            | 75                  | 73                                  |
|                | Control     | 305 (10%)                           | 2738           | (63, 93)            | (56, 92)                            | 875 (40%)        | 1329           | (62, 84)            | (57, 83)                            |
| $\geq 42$      | Case        | 5 (2%)                              | 327            | 74                  | 72                                  | 37 (20%)         | 148            | 66                  | 63                                  |
|                | Control     | 163 (6%)                            | 2738           | (37, 90)            | (29, 89)                            | 987 (43%)        | 1329           | (51, 77)            | (45, 75)                            |
| $\geq 21$      | Case        | 77 (19%)                            | 327            | 68                  | 64                                  | 166 (53%)        | 148            | 66                  | 67                                  |
|                | Control     | 1997 (42%)                          | 2738           | (58, 75)            | (52, 73)                            | 4324 (76%)       | 1329           | (57, 73)            | (58, 74)                            |

DSV = Days since vaccination, the interval in days between the date of receipt of the first mRNA dose and the date of specimen collection

VE = vaccine effectiveness; 95% CI = 95% confidence interval

<sup>1</sup> VE estimates adjusted for age group (70-79, 80-89, 90+ years); sex (men, women); epidemiological week (14, 15); and health authority (HA) (Fraser HA, Interior HA, Northern HA, Vancouver Coastal HA, Vancouver Island HA).

<sup>2</sup> VE estimates adjusted for age group (70-79, 80-89, 90+ years); sex (men, women); epidemiological week (16,17); and health authority (HA) (Fraser HA, Interior HA, Northern HA, Vancouver Coastal HA, Vancouver Island HA).

**Supplementary Table S6.** Single-dose mRNA vaccine effectiveness by mRNA product, adults ≥70 years, British Columbia, Canada

| Interval (DSV) | Case status | By mRNA product (Pfizer-BioNTech; Moderna) |                |                     |                                     |                  |                |                     |                        |
|----------------|-------------|--------------------------------------------|----------------|---------------------|-------------------------------------|------------------|----------------|---------------------|------------------------|
|                |             | Pfizer-BioNTech                            |                |                     |                                     | Moderna          |                |                     |                        |
|                |             | Vaccinated N (%)                           | Unvaccinated N | Crude VE % (95% CI) | Adjusted <sup>1</sup> VE % (95% CI) | Vaccinated N (%) | Unvaccinated N | Crude VE % (95% CI) | Adjusted VE % (95% CI) |
| 0-13           | Case        | 288 (38)                                   | 475 (62)       | 4                   | 14                                  | 57 (11)          | 475 (89)       | 3                   | 11                     |
|                | Control     | 2575 (39)                                  | 4067 (61)      | (-12, 18)           | (-1, 26)                            | 503 (11)         | 4067 (89)      | (-30, 27)           | (-20, 34)              |
| 14-20          | Case        | 143 (23)                                   | 475 (77)       | 37                  | 42                                  | 20 (4)           | 475 (96)       | 53                  | 49                     |
|                | Control     | 1940 (32)                                  | 4067 (68)      | (23, 48)            | (28, 52)                            | 361 (8)          | 4067 (92)      | (25, 70)            | (19, 68)               |
| 21-27          | Case        | 102 (18)                                   | 475 (82)       | 53                  | 54                                  | 8 (2)            | 475 (98)       | 79                  | 78                     |
|                | Control     | 1864 (31)                                  | 4067 (69)      | (42, 62)            | (41, 63)                            | 328 (7)          | 4067 (93)      | (58, 90)            | (55, 89)               |
| 28-34          | Case        | 53 (10)                                    | 475 (90)       | 71                  | 69                                  | 8 (2)            | 475 (98)       | 71                  | 68                     |
|                | Control     | 1555 (28)                                  | 4067 (72)      | (61, 78)            | (58, 77)                            | 235 (5)          | 4067 (95)      | (41, 86)            | (34, 85)               |
| 35-41          | Case        | 25 (5)                                     | 475 (95)       | 78                  | 75                                  | 5 (1)            | 475 (99)       | 78                  | 75                     |
|                | Control     | 983 (19)                                   | 4067 (81)      | (67, 86)            | (61, 84)                            | 197 (5)          | 4067 (95)      | (47, 91)            | (39, 90)               |
| ≥42            | Case        | 35 (7)                                     | 475 (93)       | 70                  | 66                                  | 7 (1)            | 475 (99)       | 60                  | 42                     |
|                | Control     | 1001 (20)                                  | 4067 (80)      | (58, 79)            | (51, 77)                            | 149 (4)          | 4067 (96)      | (14, 81)            | (-28, 74)              |
| ≥21            | Case        | 215 (31)                                   | 475 (69)       | 66                  | 64                                  | 28 (6)           | 475 (94)       | 74                  | 71                     |
|                | Control     | 5408 (57)                                  | 4067 (43)      | (60, 71)            | (57, 71)                            | 913 (18)         | 4067 (82)      | (61, 82)            | (56, 81)               |

<sup>1</sup> VE estimates adjusted for age group (70-79, 80-89, 90+ years); sex (men, women); epidemiological week (14, 15, 16, or 17); and health authority (HA) (Fraser HA, Interior HA, Northern HA, Vancouver Coastal HA, Vancouver Island HA).

**Supplementary Table S7.** Single-dose mRNA vaccine effectiveness by variant of concern (VOC) status: non-VOC, B.1.1.7 and P.1, adults ≥70 years, British Columbia, Canada

| Interval (DSV) | Case Status | Non-VOC <sup>1</sup> (n=276 cases) |                |                     |                                     | B.1.1.7 <sup>1</sup> (n=509 cases) |                |                     |                                     | P.1 <sup>1,2</sup> (n=314 cases) |                |                     |                                     |
|----------------|-------------|------------------------------------|----------------|---------------------|-------------------------------------|------------------------------------|----------------|---------------------|-------------------------------------|----------------------------------|----------------|---------------------|-------------------------------------|
|                |             | Vaccinated N (%)                   | Unvaccinated N | Crude VE % (95% CI) | Adjusted <sup>3</sup> VE % (95% CI) | Vaccinated N (%)                   | Unvaccinated N | Crude VE % (95% CI) | Adjusted <sup>2</sup> VE % (95% CI) | Vaccinated N (%)                 | Unvaccinated N | Crude VE % (95% CI) | Adjusted <sup>2</sup> VE % (95% CI) |
| 0-13           | Case        | 84 (40%)                           | 126            | 12                  | 17                                  | 140 (41%)                          | 200            | 8                   | 18                                  | 81 (43%)                         | 109            | 2                   | 11                                  |
|                | Control     | 3078 (43%)                         | 4067           | (-17, 33)           | (-10, 38)                           | 3078 (43%)                         | 4067           | (-15, 26)           | (-3, 34)                            | 3078 (43%)                       | 4067           | (-31, 27)           | (-19, 34)                           |
| 14-20          | Case        | 24 (16%)                           | 126            | 66                  | 63                                  | 66 (25%)                           | 200            | 42                  | 48                                  | 53 (33%)                         | 109            | 14                  | 24                                  |
|                | Control     | 2301 (36%)                         | 4067           | (48, 78)            | (42, 77)                            | 2301 (36%)                         | 4067           | (23, 56)            | (30, 61)                            | 2301 (36%)                       | 4067           | (-20, 38)           | (-7, 46)                            |
| 21-27          | Case        | 15 (11%)                           | 126            | 78                  | 74                                  | 52 (21%)                           | 200            | 52                  | 55                                  | 30 (22%)                         | 109            | 49                  | 52                                  |
|                | Control     | 2192 (35%)                         | 4067           | (62, 87)            | (55, 85)                            | 2192 (35%)                         | 4067           | (34, 65)            | (37, 67)                            | 2192 (35%)                       | 4067           | (23, 66)            | (26, 69)                            |
| 28-34          | Case        | 12 (9%)                            | 126            | 78                  | 70                                  | 22 (10%)                           | 200            | 75                  | 76                                  | 18 (14%)                         | 109            | 62                  | 66                                  |
|                | Control     | 1790 (31%)                         | 4067           | (61, 88)            | (43, 84)                            | 1790 (31%)                         | 4067           | (61, 84)            | (62, 85)                            | 1790 (31%)                       | 4067           | (38, 77)            | (42, 80)                            |
| 35-41          | Case        | 9 (7%)                             | 126            | 75                  | 65                                  | 11 (5%)                            | 200            | 81                  | 81                                  | 9 (8%)                           | 109            | 72                  | 68                                  |
|                | Control     | 1180 (22%)                         | 4067           | (51, 88)            | (27, 83)                            | 1180 (22%)                         | 4067           | (65, 90)            | (64, 90)                            | 1180 (22%)                       | 4067           | (44, 86)            | (35, 85)                            |
| ≥42            | Case        | 6 (5%)                             | 126            | 83                  | 72                                  | 18 (8%)                            | 200            | 68                  | 67                                  | 14 (11%)                         | 109            | 55                  | 53                                  |
|                | Control     | 1150 (22%)                         | 4067           | (62, 93)            | (33, 88)                            | 1150 (22%)                         | 4067           | (48, 80)            | (44, 81)                            | 1150 (22%)                       | 4067           | (20, 74)            | (12, 75)                            |
| ≥21            | Case        | 42 (25%)                           | 126            | 79                  | 72                                  | 103 (34%)                          | 200            | 67                  | 67                                  | 71 (39%)                         | 109            | 58                  | 61                                  |
|                | Control     | 6321 (61%)                         | 4067           | (70, 85)            | (58, 81)                            | 6321 (61%)                         | 4067           | (58, 74)            | (57, 75)                            | 6321 (61%)                       | 4067           | (43, 69)            | (45, 72)                            |

DSV = Days since vaccination, the interval in days between the date of receipt of the first mRNA dose and the date of specimen collection  
 VOC = variant of concern; VE = vaccine effectiveness; 95% CI = 95% confidence interval

<sup>1</sup> Defined as in [Supplementary Material S1](#).

<sup>2</sup> Confirmed and presumptive P.1 subset (n=314) defined by whole genome sequencing (WGS) (n=280) and screening real-time reverse transcriptase polymerase chain reaction (RT-PCR) assay positivity for 501Y and 417T (n=34), excluding specimens that were 501Y positive and 484K positive but for which the 417 SNP was not available (n=12). See [Supplementary Material S1](#).

<sup>3</sup> VE estimates adjusted for age group (70-79, 80-89, 90+ years); sex (men, women); epidemiological week (14, 15, 16, or 17); and health authority (HA) (Fraser HA, Interior HA, Northern HA, Vancouver Coastal HA, Vancouver Island HA).

**Supplementary Table S8.** Single-dose mRNA vaccine effectiveness: P.1 sensitivity analysis, adults ≥70 years, British Columbia, Canada

| Interval (DSV) | Case Status | Confirmed and presumptive P.1 (n=326 P.1 cases) <sup>1</sup> |          |                     |                                     | Confirmed P.1 only (n=280 P.1 cases) <sup>2</sup> |          |                     |                                     |
|----------------|-------------|--------------------------------------------------------------|----------|---------------------|-------------------------------------|---------------------------------------------------|----------|---------------------|-------------------------------------|
|                |             | Vacc N (%)                                                   | Unvacc N | Crude VE % (95% CI) | Adjusted <sup>3</sup> VE % (95% CI) | Vacc N (%)                                        | Unvacc N | Crude VE % (95% CI) | Adjusted <sup>4</sup> VE % (95% CI) |
| 0-13           | Case        | 85 (43%)                                                     | 112      | 0                   | 9                                   | 72 (42%)                                          | 98       | 3                   | 10                                  |
|                | Control     | 3078 (43%)                                                   | 4067     | (-33, 25)           | (-22, 32)                           | 3078 (43%)                                        | 4067     | (-32, 29)           | (-23, 34)                           |
| 14-20          | Case        | 56 (33%)                                                     | 112      | 12                  | 22                                  | 47 (32%)                                          | 98       | 15                  | 25                                  |
|                | Control     | 2301 (36%)                                                   | 4067     | (-22, 36)           | (-9, 44)                            | 2301 (36%)                                        | 4067     | (-20, 40)           | (-7, 48)                            |
| 21-27          | Case        | 31 (22%)                                                     | 112      | 49                  | 51                                  | 24 (20%)                                          | 98       | 55                  | 59                                  |
|                | Control     | 2192 (35%)                                                   | 4067     | (23, 66)            | (25, 68)                            | 2192 (35%)                                        | 4067     | (29, 71)            | (35, 75)                            |
| 28-34          | Case        | 19 (15%)                                                     | 112      | 61                  | 65                                  | 18 (16%)                                          | 98       | 58                  | 64                                  |
|                | Control     | 1790 (31%)                                                   | 4067     | (37, 76)            | (40, 79)                            | 1790 (31%)                                        | 4067     | (31, 75)            | (39, 79)                            |
| 35-41          | Case        | 9 (7%)                                                       | 112      | 72                  | 69                                  | 8 (8%)                                            | 98       | 72                  | 71                                  |
|                | Control     | 1180 (22%)                                                   | 4067     | (45, 86)            | (35, 85)                            | 1180 (22%)                                        | 4067     | (42, 86)            | (37, 87)                            |
| ≥42            | Case        | 14 (11%)                                                     | 112      | 56                  | 53                                  | 13 (12%)                                          | 98       | 53                  | 54                                  |
|                | Control     | 1150 (22%)                                                   | 4067     | (23, 75)            | (13, 75)                            | 1150 (22%)                                        | 4067     | (16, 74)            | (13, 76)                            |
| ≥21            | Case        | 73 (40%)                                                     | 112      | 58                  | 60                                  | 63 (39%)                                          | 98       | 59                  | 63                                  |
|                | Control     | 6321 (61%)                                                   | 4067     | (44, 69)            | (44, 72)                            | 6321 (61%)                                        | 4067     | (43, 70)            | (47, 74)                            |

DSV = Days since vaccination, the interval in days between the date of receipt of the first mRNA dose and the date of specimen collection  
Vacc = vaccinated; Unvacc = Unvaccinated; VE = vaccine effectiveness; 95% CI = 95% confidence interval

<sup>1</sup> Confirmed and all presumptive P.1 (n=326) defined by whole genome sequencing (WGS) (n=280) and screening real-time reverse transcription polymerase chain reaction (RT-PCR) assay positivity for 501Y and 417T (n=34), and also including specimens that were 501Y positive and 484K positive but for which the 417 SNP was not available (n=12) on the added assumption they are most likely P.1 (rather than B.1.351). See [Supplementary Material S1](#).

<sup>2</sup> Confirmed P.1 (n=280), defined by WGS only. See [Supplementary Material S1](#).

<sup>3</sup> VE estimates adjusted for age group (70-79, 80-89, 90+ years); sex (men, women); epidemiological week (14, 15, 16, or 17); and health authority (HA) (Fraser HA, Interior HA, Northern HA, Vancouver Coastal HA, Vancouver Island HA).
